# Supplementary material for: A comparative study of the localization and membrane topology of members of the RIFIN, STEVOR and PfMC-2TM protein families in Plasmodium falciparum-infected erythrocytes
Source: Springer Nature journal article supplement (doi:10.1186/s12936-015-0784-2), 2015-07-15

**A**

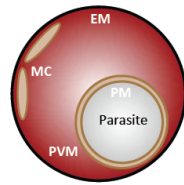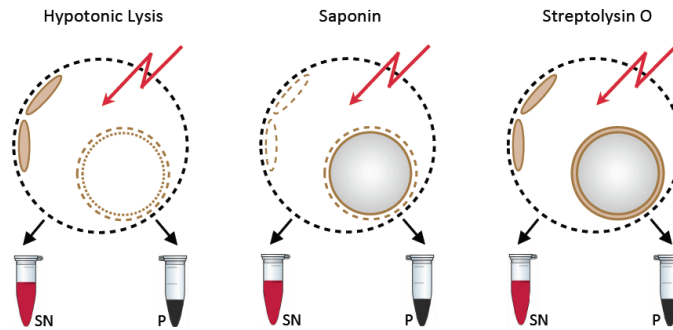

**B**

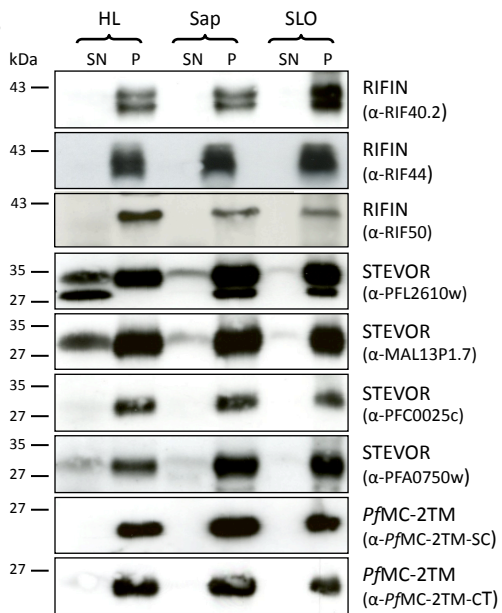

**C**

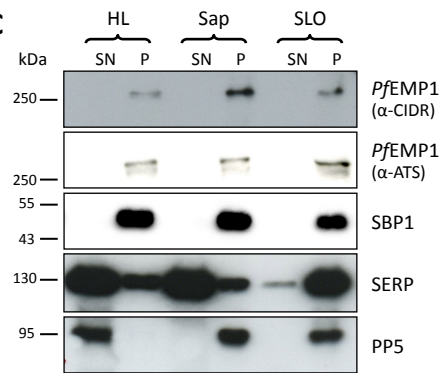

Supplement: MOESM2 [file 9761440]
